# Supplementary material for: Pan-cancer characterization of immune-related lncRNAs identifies potential oncogenic biomarkers
Source: PubMed Central journal article supplement (PMC7035327; doi:10.1038/s41467-020-14802-2), 2020-02-21
Supplement: 41467_2020_14802_MOESM3_ESM.pdf [file 41467_2020_14802_MOESM3_ESM.pdf]

## Description of Additional Supplementary Files

File Name: Supplementary Data 1

Description: The cancer types used in our analysis.

File Name: Supplementary Data 2

Description: The immune related pathway and genes.

File Name: Supplementary Data 3

Description: The overlap of lncRNA-Pathway association between TCGA data and two other datasets in immune cells.

File Name: Supplementary Data 4

Description: The top ranked 500 lncRNA-pathways across cancer types.

File Name: Supplementary Data 5

Description: The proportion of immune cell infiltration related lncRNAs across cancer types.

File Name: Supplementary Data 6

Description: The p-values for lncRNAs identified in TIMER and CIBERSORT.
